# Supplementary material for: Real-World Tumor Response of Palbociclib Plus Letrozole Versus Letrozole for Metastatic Breast Cancer in US Clinical Practice
Source: Springer Nature journal article supplement (doi:10.1007/s11523-021-00826-1), 2021-08-02
Supplement: MOESM1 [file 19533882]

## **Online Resource Material**

### **Real-World Tumor Response of Palbociclib Plus Letrozole Versus Letrozole for Metastatic Breast Cancer in US Clinical Practice**

*Targeted Oncology*

Adam Brufsky, MD, PhD, Xianchen Liu, MD, PhD, Benjamin Li, PhD, Lynn McRoy, MD,

Rachel M. Layman, MD

#### **Corresponding Authors**

Dr Adam Brufsky, MD, PhD

Email: [brufskyam@upmc.edu](mailto:brufskyam@upmc.edu)

University of Pittsburgh, College of Medicine

Dr Xianchen Liu, MD, PhD

Email: [Jasonxc.Liu@pfizer.com](mailto:Jasonxc.Liu@pfizer.com)

Pfizer Inc

**Online Resource 1.** Patient Characteristics After Stabilized Inverse Probability of Treatment Weighting

| Characteristic                     | Cohort After Stabilized Inverse Probability of Treatment Weighting |                   |                         |
|------------------------------------|--------------------------------------------------------------------|-------------------|-------------------------|
|                                    | Palbociclib +                                                      |                   | Standardized Difference |
|                                    | Letrozole (n=715)                                                  | Letrozole (n=547) |                         |
| Age, y                             |                                                                    |                   |                         |
| Mean (SD)                          | 66.2 (11.9)                                                        | 67.1 (14.9)       | 0.0716                  |
| Median (IQR)                       | 67.0 (59.0–75.0)                                                   | 68.0 (59.0–76.0)  |                         |
| Age group, <sup>a</sup> n (%), y   |                                                                    |                   |                         |
| 18–64                              | 295 (41.2)                                                         | 221 (40.4)        | –0.0168                 |
| 65–74                              | 232 (32.4)                                                         | 178 (32.6)        | 0.0036                  |
| ≥75                                | 188 (26.3)                                                         | 148 (27.0)        | 0.0149                  |
| Race/ethnicity, <sup>a</sup> n (%) |                                                                    |                   |                         |
| White                              | 501 (70.1)                                                         | 364 (66.5)        | –0.0761                 |
| Black                              | 47 (6.5)                                                           | 39 (7.1)          | 0.0218                  |
| Asian                              | 15 (2.1)                                                           | 15 (2.8)          | 0.0448                  |
| Hispanic or Latino                 | 15 (2.1)                                                           | 16 (2.9)          | 0.0488                  |
| Other/unknown                      | 137 (19.2)                                                         | 113 (20.7)        | 0.0384                  |
| Practice type, <sup>a</sup> n (%)  |                                                                    |                   |                         |
| Academic                           | 37 (5.1)                                                           | 26 (4.8)          | 0.0155                  |

|                                                        |            |            |         |
|--------------------------------------------------------|------------|------------|---------|
| Community                                              | 678 (94.9) | 521 (95.2) |         |
| Disease stage at initial diagnosis, <sup>a</sup> n (%) |            |            |         |
| I or II                                                | 254 (35.5) | 171 (31.3) | -0.0884 |
| III                                                    | 103 (14.4) | 80 (14.62) | 0.0053  |
| IV                                                     | 284 (39.7) | 230 (42.1) | 0.0496  |
| Not documented                                         | 74 (10.4)  | 65 (12.0)  | 0.0488  |
| ECOG PS, <sup>a</sup> n (%)                            |            |            |         |
| 0                                                      | 257 (36.0) | 193 (35.3) | -0.0139 |
| 1                                                      | 147 (20.5) | 118 (21.6) | 0.0267  |
| 2                                                      | 47 (6.5)   | 36 (6.6)   | 0.0029  |
| 3 or 4                                                 | 12 (1.7)   | 9 (1.6)    | -0.0025 |
| Not documented                                         | 252 (35.3) | 190 (34.8) | -0.0097 |
| Visceral disease, <sup>a</sup> n (%)                   |            |            |         |
| No                                                     | 436 (60.9) | 342 (62.5) | -0.0313 |
| Yes                                                    | 279 (39.1) | 205 (37.5) |         |
| Bone-only disease, <sup>a,b</sup> n (%)                |            |            |         |
|                                                        | 270 (37.7) | 210 (38.4) | 0.0129  |
| Brain metastases, n (%)                                |            |            |         |
|                                                        | 21 (3.0)   | 17 (3.2)   | 0.0118  |
| Number of metastatic sites, <sup>a,c</sup> n (%)       |            |            |         |
| 1                                                      | 361 (50.5) | 278 (50.8) | 0.0073  |
| 2                                                      | 196 (27.5) | 156 (28.6) | 0.0253  |
| 3                                                      | 89 (12.5)  | 65 (11.8)  | -0.0200 |

|                |          |          |         |
|----------------|----------|----------|---------|
| ≥4             | 40 (5.6) | 29 (5.4) | -0.0119 |
| Not documented | 28 (4.0) | 19 (3.4) | -0.0306 |

---

ECOG=Eastern Cooperative Oncology Group; IQR=interquartile range.

<sup>a</sup>Visceral disease was defined as metastatic disease in the lung and/or liver; patients could have had other sites of metastases. No visceral disease was defined as no lung or liver metastases.

<sup>b</sup>Bone-only disease was defined as metastatic disease in only the bone.

<sup>c</sup>Multiple metastases at the same site were counted as 1 site (eg, if a patient had 3 bone metastases in the spine, it was considered only 1 site).
